# Supplementary material for: A solid-state Sb/Sb2O3biosensor for thein situmeasurement of extracellular acidification associated with the multidrug resistance phenotype in breast cancer cells
Source: Royal Society of Chemistry journal article supplement (doi:10.1039/c8ay01458b), 2018-01-01
Supplement: c8ay01458b1.pdf [file c8ay01458b1.pdf]

**Electronic Supporting Information for**  
**A solid-state Sb/Sb<sub>2</sub>O<sub>3</sub> biosensor for the in-situ measurement of**  
**extracellular acidification associated with the multidrug resistant**  
**phenotype in the breast cancer cells**

Zhen Li<sup>a,c</sup>, Li Zong<sup>b,c</sup>, Hanmeng Liu<sup>a,d</sup>, Zhixia Yao<sup>a,d</sup>, Yujing Sun<sup>\*a,c,d</sup>, Zhuang Li<sup>\*a,c,d</sup>

<sup>a</sup> State Key Laboratory of Electroanalytical Chemistry, Changchun Institute of Applied Chemistry, Chinese Academy of Sciences, Changchun, Jilin, 130022, PR. China.

<sup>b</sup> National Center of Mass Spectrometry in Changchun, Jilin Province Key Laboratory of Chinese Medicine Chemistry and Mass Spectrometry, Changchun Institute of Applied Chemistry, Chinese Academy of Sciences, Changchun, Jilin, 130022, PR. China.

<sup>c</sup> University of Chinese Academy of Sciences, Beijing, 100049, PR. China.

<sup>d</sup> University of Science and Technology of China, Hefei, Anhui 230026, PR. China.

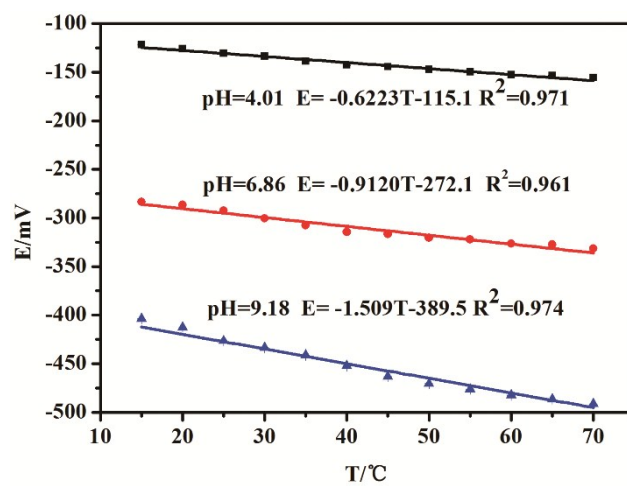

**Fig. S1** The relationship between the potential and temperature of the electrode in three standard buffers (pH=4.01, 6.86, 9.18).

**Table S1** Results of pH measurements after the interference substance was added with pH=2.00, 4.01 buffers (n=3).

| solution           | 2.00 buffer<br>+KCl | 2.00 Buffer<br>+Na <sub>2</sub> SO <sub>4</sub> | 2.00 buffer<br>+KNO <sub>3</sub> | 2.00 buffer<br>+Ca(NO <sub>3</sub> ) <sub>2</sub> | 4.01 buffer<br>+KCl | 4.01 buffer<br>+Na <sub>2</sub> SO <sub>4</sub> | 4.01 buffer<br>+KNO <sub>3</sub> | 4.01buffer<br>+Ca(NO <sub>3</sub> ) <sub>2</sub> |
|--------------------|---------------------|-------------------------------------------------|----------------------------------|---------------------------------------------------|---------------------|-------------------------------------------------|----------------------------------|--------------------------------------------------|
| SSO                | 2.10±0.02           | 2.22±0.02                                       | 2.06±0.01                        | *                                                 | 4.05±0.02           | 3.89±0.01                                       | 4.03±0.01                        | 3.69±0.02                                        |
| glass<br>electrode | 2.05±0.01           | 2.14±0.01                                       | 2.03±0.01                        | 1.87±0.01                                         | 4.00±0.01           | 3.88±0.01                                       | 3.98±0.01                        | 3.67±0.01                                        |
| ΔpH                | 0.05±0.03           | 0.08±0.03                                       | 0.03±0.02                        | *                                                 | 0.05±0.03           | 0.01±0.02                                       | 0.05±0.02                        | 0.02±0.03                                        |

\* represents that the pH value of the solution was not measured by the fabricated SSO electrode due to the linear relationship between the potential and pH in the range of 2-12.
